# Supplementary material for: One-step electrodeposition preparation of NiCoSe2@carbon cloth as a flexible supercapacitor electrode material
Source: Royal Society of Chemistry journal article supplement (doi:10.1039/d3nj00900a), 2023-01-01
Supplement: d3nj00900a1.pdf [file d3nj00900a1.pdf]

## **One-step electrodeposition preparation of NiCoSe<sub>2</sub>@Carbon cloth as flexible supercapacitor electrode material**

*Yi Jiang<sup>1\*</sup>, Bin Cai<sup>2</sup>, Ruixiang Xu<sup>1</sup>, Hao Gu<sup>2</sup>, Xin Qi<sup>1</sup>, Zhenjun Xu<sup>1</sup>, Jing Xu<sup>1</sup>, Guosong Liu<sup>1\*</sup>*

<sup>1</sup>School of Science, Changchun Institute of Technology, Changchun, 130012, China

<sup>2</sup>Key Laboratory of Advanced Structural Materials, Ministry of Education & Advanced Institute of Materials Science, Changchun University of Technology, Changchun, Changchun 130012, China

\* jiangyi@ccit.edu.cn; \* liuguosong@ccit.edu.cn;

\*To whom all correspondence should be addressed.

## **1.1. Materials preparation**

$\text{NiCl}_2 \cdot 6\text{H}_2\text{O}$  (metals basis, purity  $\geq 99.9\%$ ),  $\text{CoCl}_2 \cdot 6\text{H}_2\text{O}$  (AR) ,  $\text{SeO}_2$  (AR, purity  $\geq 99\%$ ),  $\text{LiCl}$  ( purity  $\geq 99\%$ ) were obtained from aladdin. All chemicals and reagents in the study were used without any further purification. The solvent in the experiment was deionized water.

## **1.2 Characterization**

The materials were characterized by scanning electron microscope (SEM, JSM-IT510) , X-ray diffraction (XRD, Rigaku D/MAX 2500PC), X-ray Photoelectron Spectroscopy (XPS, VG ESCALAB MKII spectrometer).

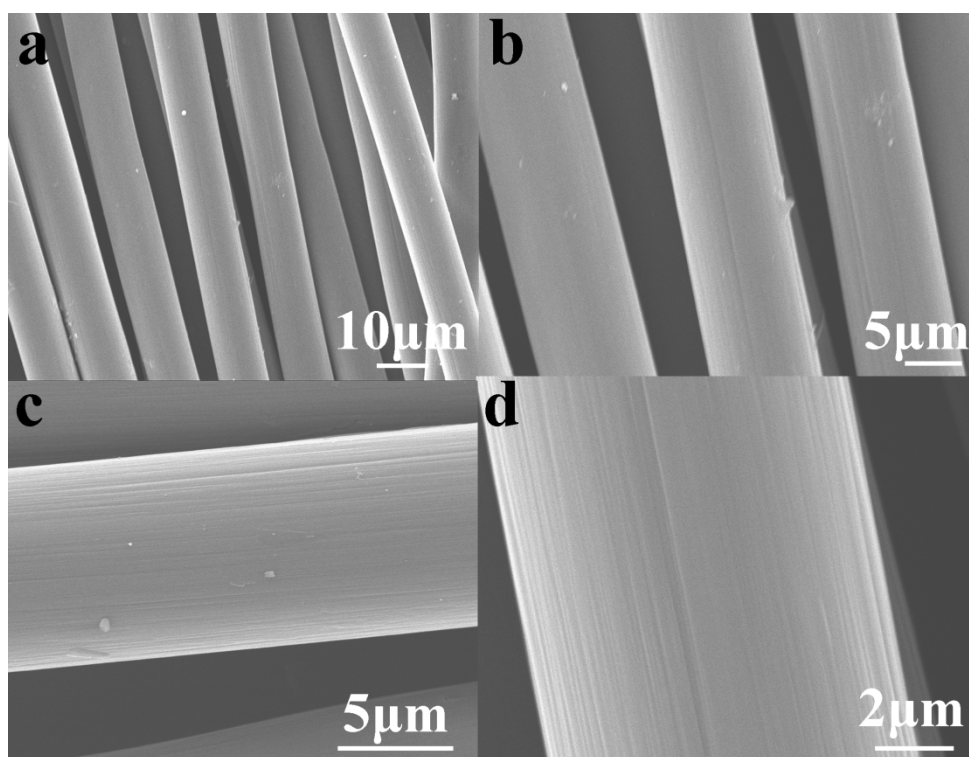

**Figure S1.** SEM of Carbon Cloth.

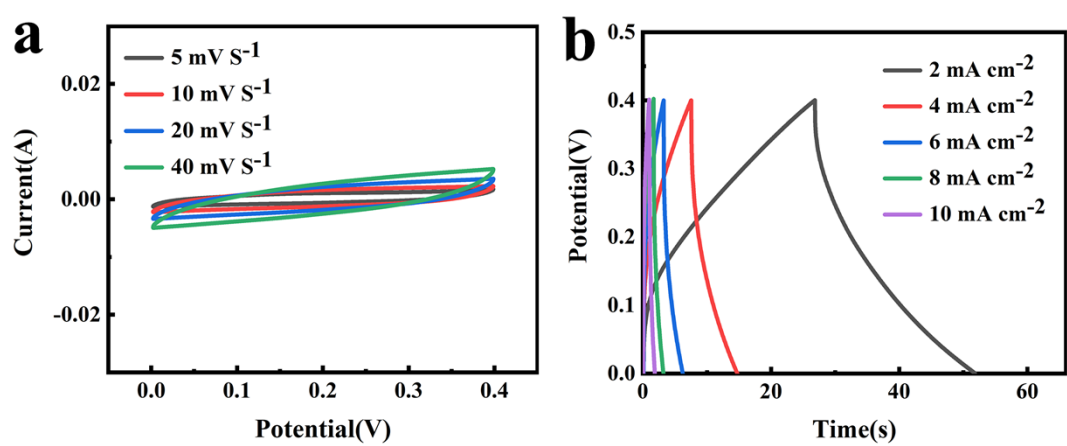

**Figure S2. CV and GCD of Carbon Cloth.**

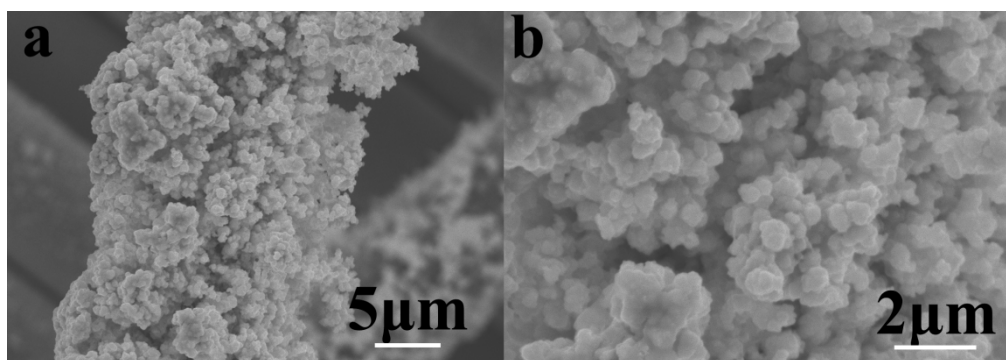

**Figure S3.** Electrodeposition at 30°C.

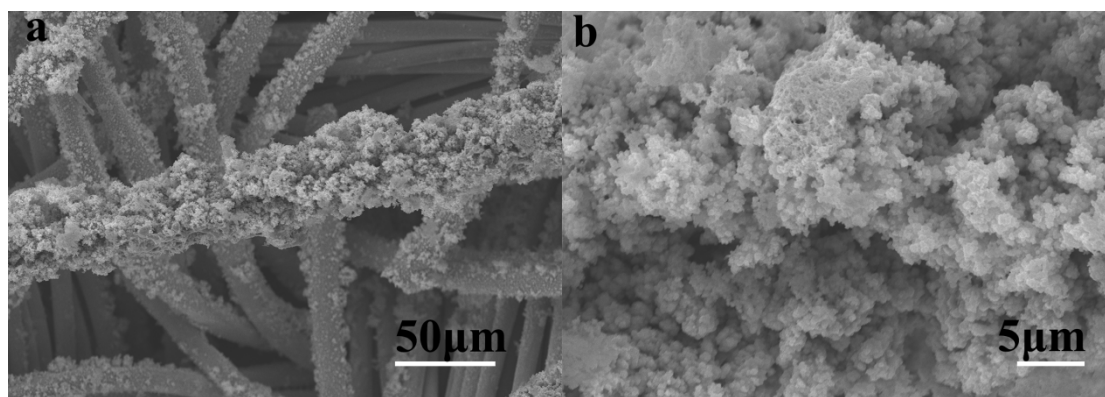

**Figure S4.** Electrodeposition at 50°C.

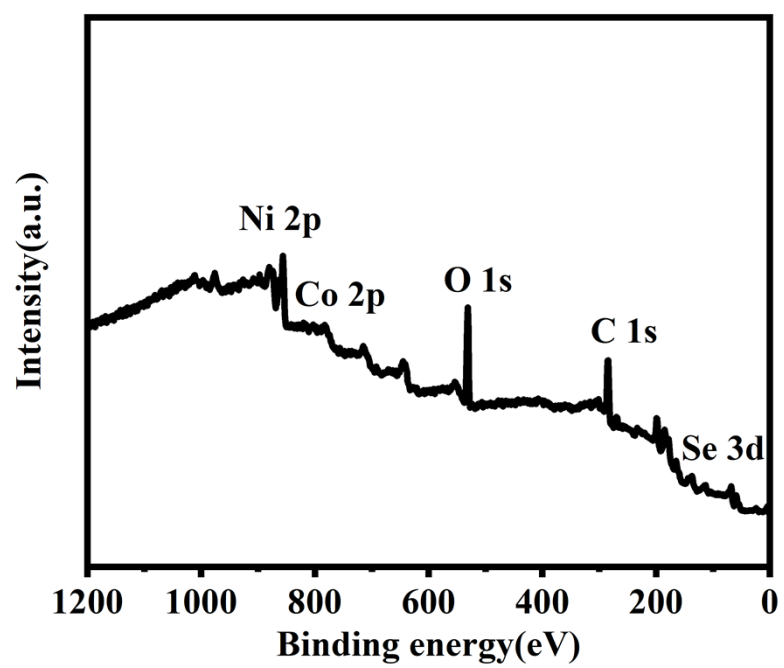

**Figure S5.** XPS patterns of NiCoSe<sub>2</sub>@CC.

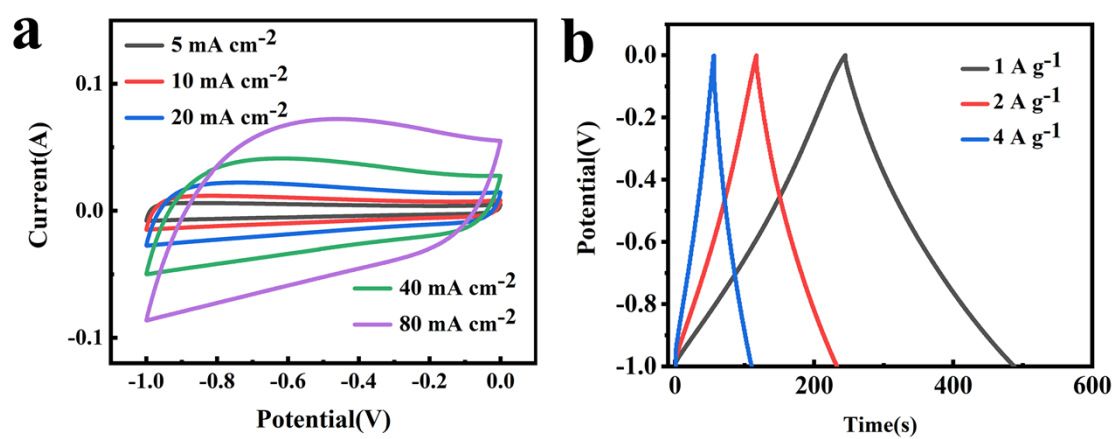

Figure S6. CV and GCD of the AC@CC.

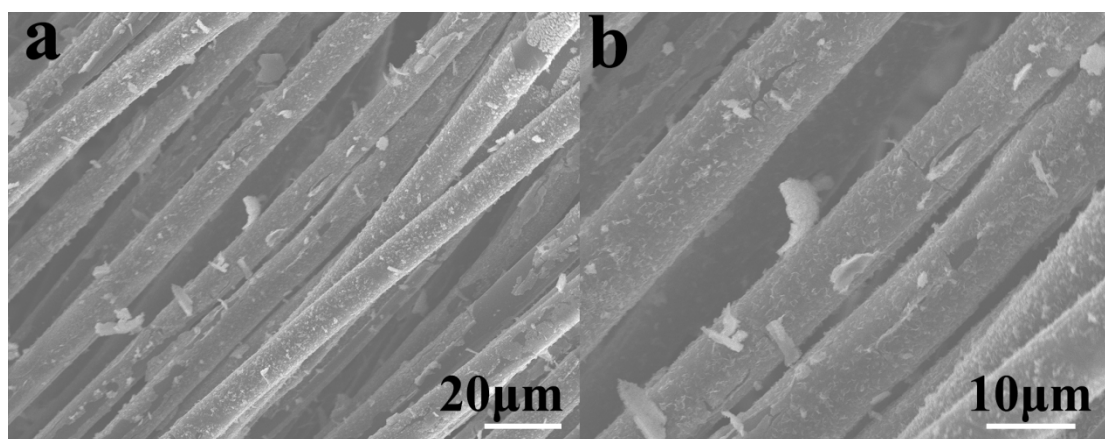

**Figure S7.** SEM of the NiCoSe<sub>2</sub>@CC after the cycle.

The specific capacity ( $C_s$ , mF cm<sup>-2</sup>) and specific capacitance ( $C_m$ , F g<sup>-1</sup>) of the materials was calculated from the GCD curves using Eq. S1 and Eq. S2, as follow:

$$C_s = \frac{I \times \Delta t}{s \times \Delta V} \quad (S1)$$

$$C_m = \frac{I \times \Delta t}{m \times \Delta V} \quad (S2)$$

where  $I$  is the discharge current density (A g<sup>-1</sup>);  $m$  represents the mass of active materials grown on CC for three-electrode configurations (g);  $\Delta t$  is the discharge time (s); and  $\Delta V$  is the potential window (V).

In order to achieve the optimum mass ratio of as-prepared positive electrode to AC negative electrodes, we examined the charge balance using the given equation,  $q^+ = q^-$ . The mass of the positive electrode and negative electrode was tuned according to the following Eq. S3 and Eq. S4:

$$Q = C \times \Delta V \times m \quad (S3)$$

$$\frac{m^+}{m^-} = \frac{C_- \times \Delta V_-}{C_+ \times \Delta V_+} \quad (S4)$$

Where  $C$  is the specific capacity (investigated through the three-electrode system); + and – represents positive and negative electrodes.

The energy density ( $E$ , Wh kg<sup>-1</sup>) and power density ( $P$ , W kg<sup>-1</sup>) of the ASCs were investigated by Eq. S5 and Eq. S6, respectively, as follows:

$$E = \frac{C_m \times \Delta V^2}{2 \times 3.6} \quad (S5)$$

$$P = \frac{3600 \times E}{\Delta t} \quad (S6)$$
